# Supplementary material
Source: publisher site journal article supplement (https://www.dovepress.com/article/297278)
Supplement: Supplementary file 1 [file get_supplementary_file.php]

**Table S1** Comparison of the case-mix between the training set and validation set

| Parameters |  | Training set | Validation set | P value |
| --- | --- | --- | --- | --- |
| Gender | Male  Female | 243  144 | 122  70 | 0.860 |
| Age | <70  ≥70 | 273  114 | 125  67 | 0.184 |
| BMI | <25  ≥25 | 331  56 | 155  37 | 0.139 |
| Smoke | Yes  No | 208  179 | 84  108 | 0.569 |
| Preoperative albumin (g/dL) | <3.5  ≥3.5 | 105  282 | 59  133 | 0.366 |
| ASA Score | 1-2  3 | 352  35 | 171  21 | 0.468 |
| NRS Score | <3  ≥3 | 324  63 | 152  40 | 0.177 |
| Preoperative clinical AJCC stage | I+II  III | 228  159 | 110  82 | 0.790 |
| Preoperative chemoradiation | Yes  No | 64  323 | 43  149 | 0.087 |
| Maximum tumor diameter | >5cm  ≤5cm | 133  254 | 68  124 | 0.803 |
| Operation time | <180min  ≥180min | 241  146 | 114  78 | 0.500 |
| Intraoperative hemorrhage | <150ml  ≥150ml | 314  73 | 126  66 | 0.431 |
| Intraoperative blood transfusion | Yes  No | 77  310 | 65  127 | 0.542 |
| Anastomosis level from anal verge | ≤5cm  >5cm | 153  234 | 87  105 | 0.122 |

**Notes:** AL, anastomotic leakage; BMI, Body Mass Index; ASA, American Society of Anesthesiologists; NRS, Nutrition Risk Screening; AJCC, American Joint Committee on Cancer.
